# Supplementary material for: Single-Cell Analysis Reveals the Immune Characteristics of Myeloid Cells and Memory T Cells in Recovered COVID-19 Patients With Different Severities
Source: Front Immunol. 2022 Jan 3;12:781432. doi: 10.3389/fimmu.2021.781432 (PMC8762286; doi:10.3389/fimmu.2021.781432)
Supplement: Supplementary file 3 [file Table_2.xlsx]

## Sheet: Integrate data
Table S2a.The number of recovered cells and distinct clonotypes identified for healthy controls and COVID-19 recovered patients
sampleID	dataset	Number of cells after filtration	BClone#	TClone#
LI_H1	Li dataset	8316	316	3279
LI_H2	Li dataset	9605	647	3325
LI_P1	Li dataset	8624	84	1476
LI_P10	Li dataset	9812	493	648
LI_P2	Li dataset	5908	214	455
LI_P3	Li dataset	8895	446	1604
LI_P4	Li dataset	7071	120	1088
LI_P5	Li dataset	10141	375	1080
LI_P6	Li dataset	4623	206	966
LI_P7	Li dataset	2544	252	182
LI_P8	Li dataset	6260	227	1000
LI_P9	Li dataset	4851	313	614
S-HC003	Ren dataset	4937	265	2079
S-HC004	Ren dataset	6008	364	2421
S-HC005	Ren dataset	9142	720	1541
S-HC006	Ren dataset	6092	340	1341
S-HC007	Ren dataset	7074	402	1682
S-HC008	Ren dataset	3673	310	No TCR single cell sequencing
S-HC009	Ren dataset	4380	351	No TCR single cell sequencing
S-HC010	Ren dataset	5138	418	1437
S-HC011	Ren dataset	3832	328	1120
S-HC012	Ren dataset	5035	492	1112
S-HC013	Ren dataset	10477	325	4440
S-HC014	Ren dataset	8393	623	3006
S-HC021	Ren dataset	5966	424	1216
S-HC022	Ren dataset	4860	199	891
S-HC023	Ren dataset	4689	134	880
S-HC024	Ren dataset	5228	566	1329
S-HC025	Ren dataset	4062	409	1083
S-M001	Ren dataset	2642	412	1
S-M021	Ren dataset	7354	273	1647
S-M022	Ren dataset	6510	503	1125
S-M031-1	Ren dataset	8500	513	3634
S-M037	Ren dataset	8751	1260	1397
S-M042-2	Ren dataset	12960	731	2347
S-S028	Ren dataset	7073	383	1305
S-S029	Ren dataset	6697	1122	1563
S-S030	Ren dataset	5002	444	733
S-S031	Ren dataset	5966	1197	976
S-S033	Ren dataset	4628	230	865
S-S063	Ren dataset	3170	161	505

## Sheet: Quality control metrics 
Table S2b. Quality control metrics for Li dataset
scRNA-seq						BCR scVDJ-seq					TCR scVDJ-seq
Sample ID	Number of cells detected	Mean reads per cell	Median genes detected per cell	Total reads	Q30%	Number of cells detected	Mean read pairs per Cell	Number of productive cells	Total read pairs	Q30%	Number of cells detected	Mean read pairs per Cell	Number of productive cells	Total reads	Q30%
P1	9169	39037	1536	357933306	0.878	179	63021	122	26155269	0.898	4647	9334	3099	43378198	0.887
P2	6863	51542	1456	353733269	0.876	531	27053	314	21251456	0.901	2622	6954	1369	18234179	0.88
P3	9444	38097	1534	359791940	0.897	1210	11937	771	11280801	0.878	5910	6474	3878	38264510	0.895
P4	7462	47107	1458	351516789	0.869	241	52848	164	14365375	0.85	3962	8145	2416	32271946	0.892
P5	11015	33036	1303	363902443	0.872	795	19699	514	14444413	0.869	5249	6566	3020	34466693	0.885
P6	5243	66633	1566	349357475	0.871	440	31758	268	12736466	0.838	3112	9979	2056	31057318	0.89
P7	2703	113607	1262	307080849	0.852	437	32712	291	15661046	0.871	851	21637	481	18413403	0.871
P8	6489	53542	1567	347435747	0.875	371	34645	274	13973958	0.851	3491	9838	2193	34344557	0.888
P9	5573	60852	1446	339133542	0.867	695	22199	511	14295563	0.838	2154	11993	1326	25833683	0.888
P10	10582	35326	1179	373828925	0.871	1083	18735	723	12853336	0.858	4203	11003	2201	46248262	0.893
H1	8386	67187	1702	563426913	0.925	544	48079	383	15428835	0.866	4434	5843	3864	25910946	0.909
H2	9684	48763	1692	472218252	0.914	1066	19935	736	20290324	0.872	4372	5901	3904	25800414	0.912
